# Supplementary material
Source: publisher figshare collection journal article supplement (https://tandf.figshare.com/ndownloader/files/17838017)
Supplement: Supplementary file 1 [file 17838017]

Table I.

STROBE Statement—checklist of items that should be included in reports of ***cross-sectional studies***

|  | Item No | Recommendation |  |
| --- | --- | --- | --- |
| **Title and abstract** | 1 | (*a*) Indicate the study’s design with a commonly used term in the title or the abstract | Ok |
| (*b*) Provide in the abstract an informative and balanced summary of what was done and what was found | Lines 9-19 |
| Introduction | | |  |
| Background/rationale | 2 | Explain the scientific background and rationale for the investigation being reported | Lines 28-54 |
| Objectives | 3 | State specific objectives, including any prespecified hypotheses | Lines 55-58 |
| Methods | | |  |
| Study design | 4 | Present key elements of study design early in the paper | Lines 61-85 |
| Setting | 5 | Describe the setting, locations, and relevant dates, including periods of recruitment, exposure, follow-up, and data collection | Lines 61-64 80-82 |
| Participants | 6 | Give the eligibility criteria, and the sources and methods of selection of participants. | Line 71-72 |
| Variables | 7 | Clearly define all outcomes, exposures, predictors, potential confounders, and effect modifiers. Give diagnostic criteria, if applicable | Lines 72-79 |
| Data sources/ measurement | 8 | For each variable of interest, give sources of data and details of methods of assessment (measurement). Describe comparability of assessment methods if there is more than one group | Lines 86-128 |
| Bias | 9 | Describe any efforts to address potential sources of bias | Not appl. |
| Study size | 10 | Explain how the study size was arrived at | Not appl. |
| Quantitative variables | 11 | Explain how quantitative variables were handled in the analyses. If applicable, describe which groupings were chosen and why | Lines 130-134 |
| Statistical methods | 12 | (*a*) Describe all statistical methods, including those used to control for confounding | Lines 135-158 |
| (*b*) Describe any methods used to examine subgroups and interactions | Lines 143-158 |
| (*c*) Explain how missing data were addressed | Not appl. |
| (*d*) If applicable, describe analytical methods taking account of sampling strategy | 136-139 |
| (*e*) Describe any sensitivity analyses | Not appl. |

Continued on next page

| Results | | |  |
| --- | --- | --- | --- |
| Participants | 13 | (a) Report numbers of individuals at each stage of study—eg numbers potentially eligible, examined for eligibility, confirmed eligible, included in the study, completing follow-up, and analysed | Lines 163-172 |
| (b) Give reasons for non-participation at each stage | Lines 188-189 |
| (c) Consider use of a flow diagram | Not appl. |
| Descriptive data | 14 | (a) Give characteristics of study participants (eg demographic, clinical, social) and information on exposures and potential confounders | Table 1 |
| (b) Indicate number of participants with missing data for each variable of interest | Not appl. |
| Outcome data | 15 | Report numbers of outcome events or summary measures | Figure 1 |
| Main results | 16 | (*a*) Give unadjusted estimates and, if applicable, confounder-adjusted estimates and their precision (eg, 95% confidence interval). Make clear which confounders were adjusted for and why they were included | Table 2 and lines 176-186 |
| (*b*) Report category boundaries when continuous variables were categorized | Lines 91-93 and 127-128 |
| (*c*) If relevant, consider translating estimates of relative risk into absolute risk for a meaningful time period | Not appl. |
| Other analyses | 17 | Report other analyses done—eg analyses of subgroups and interactions, and sensitivity analyses | Lines 188-212 |
| Discussion | | |  |
| Key results | 18 | Summarise key results with reference to study objectives | Lines 217-220 232-236 |
| Limitations | 19 | Discuss limitations of the study, taking into account sources of potential bias or imprecision. Discuss both direction and magnitude of any potential bias | Lines 270-280 |
| Interpretation | 20 | Give a cautious overall interpretation of results considering objectives, limitations, multiplicity of analyses, results from similar studies, and other relevant evidence | Lines 281-286 |
| Generalisability | 21 | Discuss the generalisability (external validity) of the study results | Not appl. |
| Other information | | |  |
| Funding | 22 | Give the source of funding and the role of the funders for the present study and, if applicable, for the original study on which the present article is based | Lines 293-294 |

*Give information separately for cases and controls in case-control studies and, if applicable, for exposed and unexposed groups in cohort and cross-sectional studies.

**Note:** An Explanation and Elaboration article discusses each checklist item and gives methodological background and published examples of transparent reporting. The STROBE checklist is best used in conjunction with this article (freely available on the Web sites of PLoS Medicine at http://www.plosmedicine.org/, Annals of Internal Medicine at http://www.annals.org/, and Epidemiology at http://www.epidem.com/). Information on the STROBE Initiative is available at www.strobe-statement.org.
